# Supplementary material for: RET Mutational Spectrum in Hirschsprung Disease: Evaluation of 601 Chinese Patients
Source: PubMed Central journal article supplement (PMC3235168; doi:10.1371/journal.pone.0028986), 2011-12-09

981G>A Q327Q

WildUype GCUCCCCGGGGACACCUGGGCCCAGCA**G**ACCUUCCGGGUGGAACACUGGCCCAAC

MuUaUion GCUCCCCGGGGACACCUGGGCCCAGCA**A**ACCUUCCGGGUGGAACACUGGCCCAAC

Wildtype

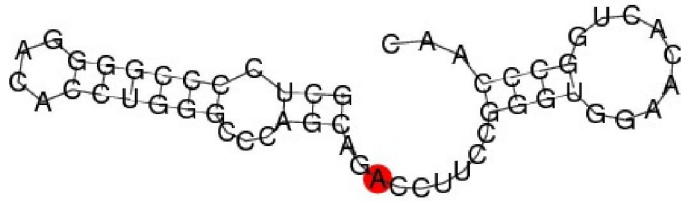

Mutation

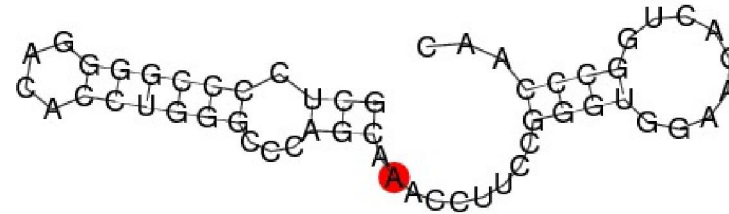

Wild-Uype free energy:-19.0 kcal/mol

MuUaUion free energy:-19.0 kcal/mol

1393C>U L465L

UCAGCCGAGGACACCUCGGGGGAUCCUGUUUGUGAAUGACACCAAGGCCUGCGGC

UCAGCCGAGGACACCUCGGGGGAUUUGUUUGUGAAUGACACCAAGGCCUGCGGC

Wildtype

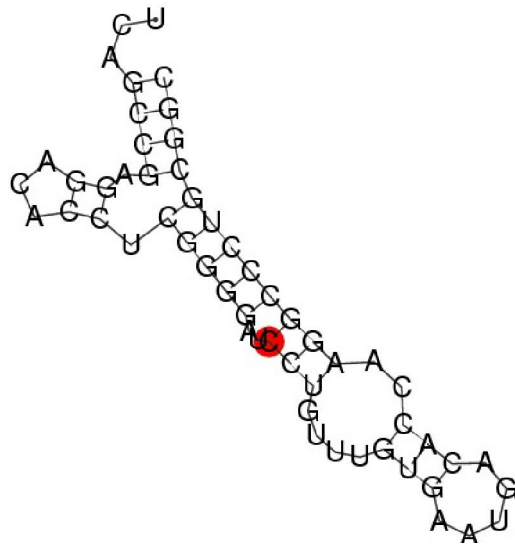

Mutation

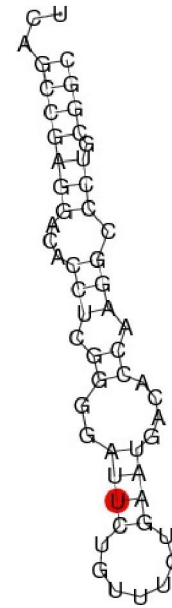

Wild-type free energy:-16.1 kcal/mol

Mutant free energy:-14.5 kcal/mol

3231 C>G L1077L

CCGAACUGGCCUGGAGAGAGUCCUGUACCACUCACGAGAGCUGAUGGCACUAACACUGGGU  
CCGAACUGGCCUGGAGAGAGUCCUGUACCACUGACGAGAGCUGAUGGCACUAACACUGGGU

Wildtype

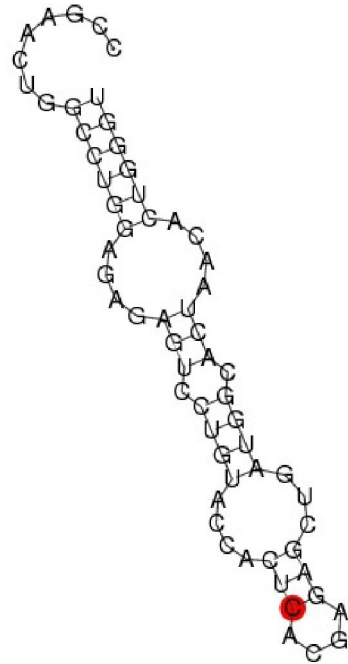

Mutation

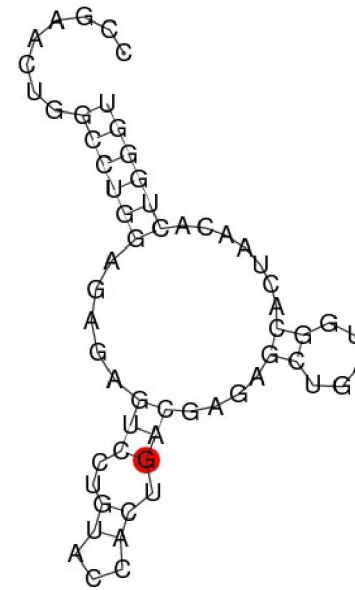

Wild-type free energy:-12.2 kcal/mol

Mutant free energy:-9.3 kcal/mol

1953 G>A L651L

UCCUCUUCUCCUUCAUCGUCUCGGUGCUGCU**G**UCUGCCUUCUGCAUCCACUGCUACCACA  
UCCUCUUCUCCUUCAUCGUCUCGGUGCUGCU**A**UCUGCCUUCUGCAUCCACUGCUACCACA

Wildtype

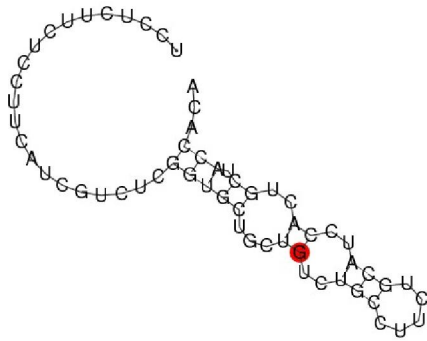

Mutation

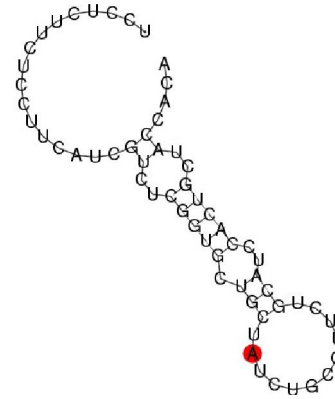

Wild-type free energy:

-9.1 kcal/mol

Mutation free energy:

-7.6 kcal/mol

2523 G>A P841P

GCAGCCGCAACUCCAGCUCCCUGGACCACCCGGAUGAGCGGGCCCUCACCAUGGG

GCAGCCGCAACUCCAGCUCCCUGGACCACCCAAGAUGAGCGGGCCCUCACCAUGGG

Wildtype

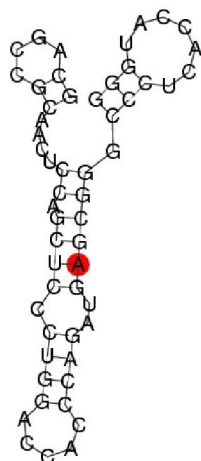

Mutation

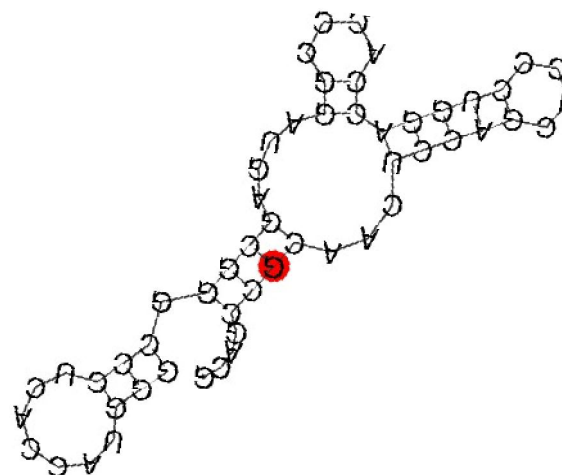

Wild-type free energy: -15.5 kcal/mo

Mutation free energy: -16.1kcal/mol

2862 G>A G954G

GAUCGUGACCCUAGGGGGAAACCCCUAUCCUGGGAUUCCUCCUGAGCGGCUCUUCAACCU

GAUCGUGACCCUAGGGGGAAACCCCUAUCCUGGAUUCCUCCUGAGCGGCUCUUCAACCU

Wildtype

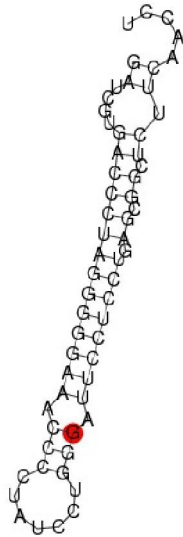

Mutation

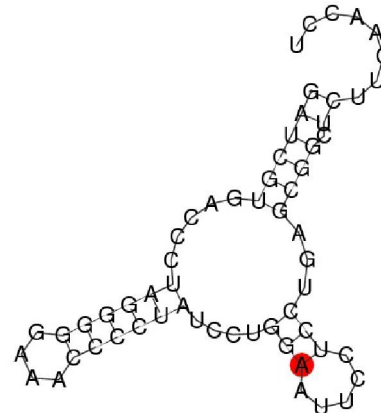

Wild-type free energy:

-20.76 kcal/mol

Mutation free energy:

-18.6 kcal/mol



3185 A>G Y1062C

AGAAUCUAGUAAUGCAUGGGAAAUUCUACCAUAGAGUUUGUUUU  
AGAAUCUAGUAAUGCAUGGGAAAUUCUACCAUAGAGUUUGUUUU

Evofold functional RNA substructure

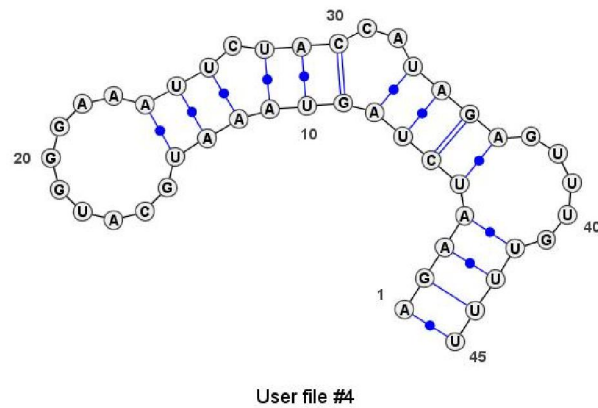

Wild-type free energy:

-4.4 kcal/mol

Mutation free energy:

-4.1kcal/mol

RNA substructure altered by mutation

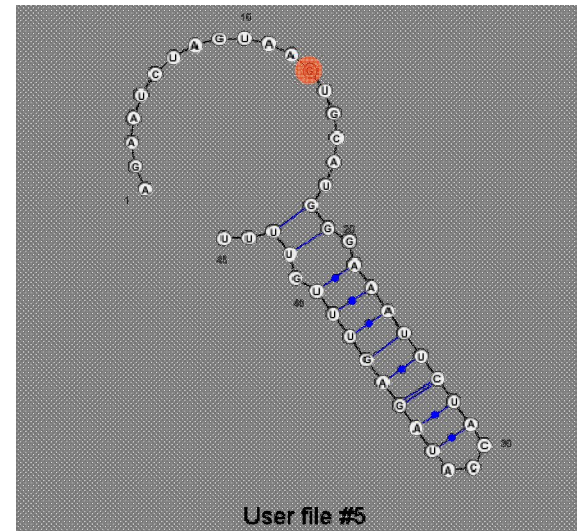

Supplement: pone.0028986.s001.pdf [file pone.0028986.s001.pdf]
